# Supplementary material for: Multiple Genes Cause Postmating Prezygotic Reproductive Isolation in the Drosophila virilis Group
Source: PubMed Central journal article supplement (PMC5144975; doi:10.1534/g3.116.033340), 2016-10-10
Supplement: supp_g3.116.033340_FigureS2.pdf [file supp_g3.116.033340_FigureS2.pdf]

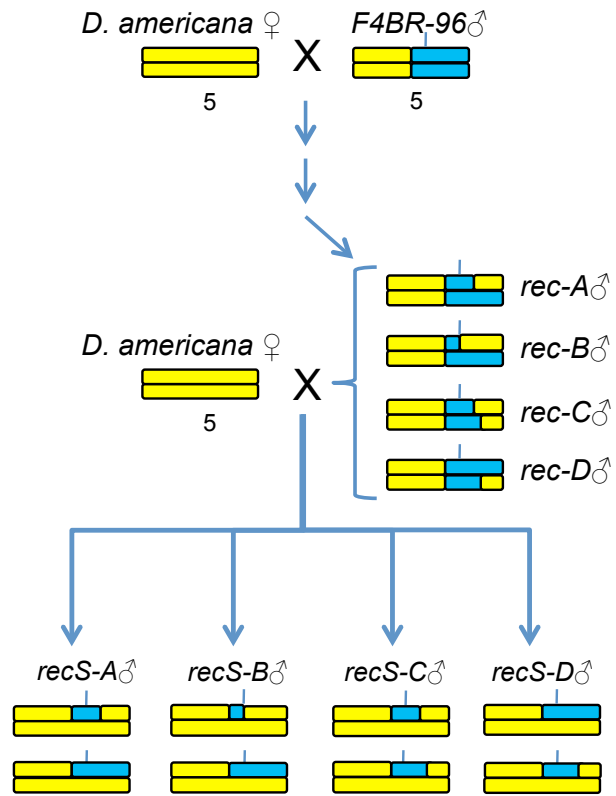

**Figure S2** Crossing scheme to obtain additional recombinants from RecIntLs. (The example shown here uses the line F4BR-96.)
