# Supplementary material for: Multiple Genes Cause Postmating Prezygotic Reproductive Isolation in the Drosophila virilis Group
Source: PubMed Central journal article supplement (PMC5144975; doi:10.1534/g3.116.033340), 2016-10-10
Supplement: supp_g3.116.033340_FigureS3.pdf [file supp_g3.116.033340_FigureS3.pdf]

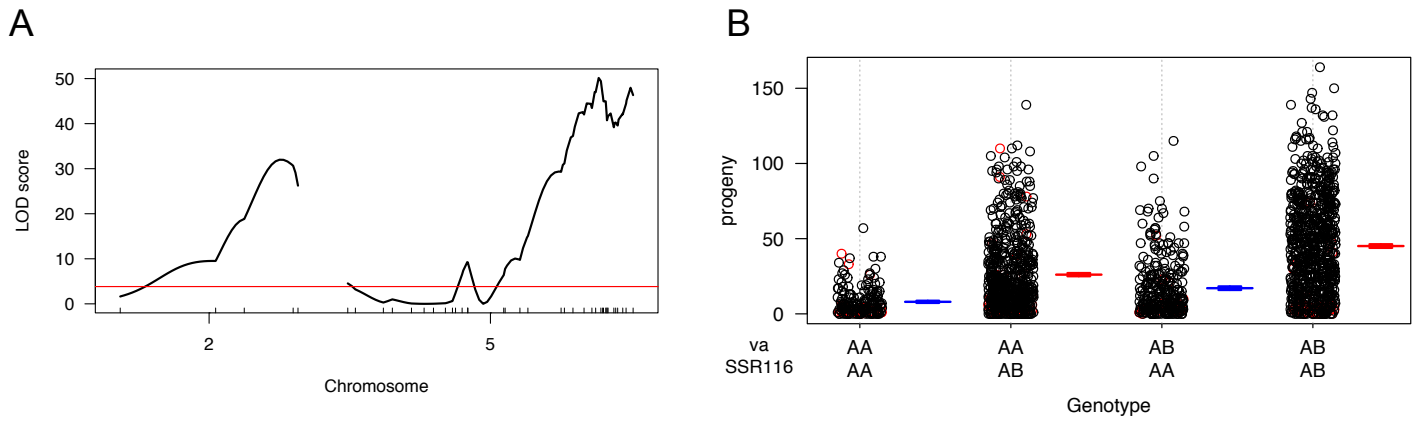

**Figure S3** Single-QTL scan results. (A) The LOD profile of the single-QTL scan on chromosomes 2 and 5. The significance threshold ( $\alpha = 0.01$ ) is shown in red. (B) The phenotypic effects of the markers with the highest LOD scores on chromosome 2 (*va*) and on chromosome 5 (SSR-116) partitioned by genotype at both markers. Each circle represents an individual in the mapping population (a red circle indicates a missing/imputed genotype for one of the two markers, which is *va* in all cases), and the average effect of the two genotype combinations is indicated in red or blue (error bars indicate standard error).
