# Supplementary material for: Multiple Genes Cause Postmating Prezygotic Reproductive Isolation in the Drosophila virilis Group
Source: PubMed Central journal article supplement (PMC5144975; doi:10.1534/g3.116.033340), 2016-10-10
Supplement: supp_g3.116.033340_TableS1.pdf [file supp_g3.116.033340_TableS1.pdf]

■ **Table S1** Genetic markers used in this study, their coordinates, and primer sequences.

| Marker     | Scaffold <sup>1</sup> | Scaffold coords.  | Chr. | Chr. coords. <sup>2</sup> | Forward                   | Reverse                    |
|------------|-----------------------|-------------------|------|---------------------------|---------------------------|----------------------------|
| SSR72      | 12822                 | 1724188-1724354   | 2    | 1724188-1724354           | TGCAGTCAAACTGGGTCAA       | GCAAGACCAAAAGTGCGAGT       |
| SSR33      | 13047                 | 16959223-16959455 | 2    | 6359965-6360197           | CATTTCTGCTGGCTAGCTT       | GTCAGACACAGCGACGACAT       |
| SSR74      | 13047                 | 14987288-14987501 | 2    | 8331938-8332112           | CCTTGGCATGTTTTAGAGCAA     | AAGCGACGCCAAAATATAC        |
| <i>va</i>  | 12855                 | N/A               | 2    | N/A                       | N/A                       | N/A                        |
| SSR81      | 12855                 | 9909979-9910129   | 2    | 33229398-33229548         | TGCACGTAAGTGTGAATCTGC     | GTGCCAATCACATCGCAGT        |
| SSR66      | 12823                 | 997910-998114     | 5    | 997910-998118             | CTCGTGTTCGCAATGTTTAC      | GCCGCAAATAAAATGTTGAT       |
| SSR104     | 12823                 | 1689490-1689676   | 5    | 1689490-1689676           | CGTACGTACCGAGAAGACA       | AGTACGTGTGGCATCAGCAA       |
| SSR121     | 10324                 | 594567-594746     | 5    | 3069112-3069291           | TGCGCACTAAATGAGATGCT      | CAAAGGCGTCATGGTAACTT       |
| SSR123     | 12875 <sup>3</sup>    | 912756-912964     | 5    | 4530387-4530596           | AAGGTTTCCAGCGAATAGGC      | CGTTGCTTACGTCAATCGAG       |
| SSR119     | 12875                 | 20444191-20444368 | 5    | 5610567-5610743           | GAGAAGCGAGAGGCACACTT      | CCAGGTAGGCTCTGTCCAAC       |
| SSR58      | 12875                 | 19509634-19509842 | 5    | 6545087-6545300           | TGCCTAGCATTGGCACTTA       | AAAAGAGCGTGCCAAAAGAAA      |
| SSR192     | 12875                 | 18634421-18634630 | 5    | 7420304-7420513           | ATCAAGACCCAAGCCGGAACCAG   | CTGGTTTCCGGCTTGGGTCTTGAT   |
| SSR190     | 12875                 | 17808454-17808680 | 5    | 8246254-8246480           | TGCCTGCTGATGAATCACGTGAC   | TGTCACGTGATTCATCAGCAGGCA   |
| SSR95      | 12875                 | 16718920-16719133 | 5    | 9335798-9336014           | TGTGCCTGCTGACAAAACAT      | ACACTGCTGCTTGCATTTA        |
| SSR138     | 12875                 | 16037240-16037447 | 5    | 10017486-10017694         | TCGTACCAATGTTGTCAATGC     | ACAGGAAGTGGGTGGAAGTG       |
| SSR155     | 12875                 | 15450044-15450076 | 5    | 10604771-10604976         | TGGGACAAATGTGCCAAATA      | ATATGCTCGGTCCGAGATTG       |
| SSR169     | 12875                 | 14987033-14987196 | 5    | 11067738-11067901         | CATCAAGGAGCTGGCCTATC      | ACTTCTCCGCCGTACAACCTG      |
| <i>pup</i> | 12875                 | 14961086-14964626 | 5    | 11084412-11091072         | N/A                       | N/A                        |
| SSR181     | 12875                 | 14501333-14501602 | 5    | 11553332-11553601         | CAAGGGCATTGACTTCTACG      | GGTTTTGGCTCAAAATCCAG       |
| SSR23      | 12875                 | 14309322-14309540 | 5    | 11745404-11745612         | AAACTGGCAGATGGGCATAG      | CCACGATTTCAGAAGCACAA       |
| SSR179     | 12875                 | 13607115-13607443 | 5    | 12447491-12447819         | TGACGCAAGTTGGCAATTAAC     | ACTTGCCGATGAAGTTTTTCG      |
| SSR178     | 12875                 | 13299025-13299315 | 5    | 12755619-12755909         | AGTGCCACAAAACCGAAAAC      | GAATGCCGCATAGATTCTCTC      |
| SSR93      | 12875                 | 12612982-12613197 | 5    | 13441731-13441952         | TCGAACTCGATCTTCTAGCTTCT   | TTGAACTCTTACGCGACTTT       |
| <i>B</i>   | 12875                 | 12492243-12542471 | 5    | 13512463-13562691         | N/A                       | N/A                        |
| SSR188     | 12875                 | 11790642-11790879 | 5    | 14264055-14264292         | CGACGCACACAAACGCAATACTTTG | CAAAGTATTGCGTTTGTGTGCGCTCG |
| SSR60      | 12875                 | 10970098-10970252 | 5    | 15084664-15084836         | CAAAAGTGTTGCCTTGATGG      | GGGTTCTAGCCCCCAAATAA       |
| SSR90      | 12875                 | 9976996-9977241   | 5    | 16077689-16077938         | ACTTTGCCAAGCTGTGAAGG      | GCGTCTCGTATGCTCTGCTA       |
| SSR176     | 12875                 | 9364934-9365179   | 5    | 16689755-16690000         | TGCCATTTGCGTATTTTGTG      | CTGCAATAGGGGGTCAAATAG      |
| SSR116     | 12875                 | 8785474-8785673   | 5    | 17269263-17269460         | CCCCATTGAAAGTTCATCCA      | GTCAGGAGGCCACATTGTTT       |
| SSR118     | 12875                 | 8359663-8359861   | 5    | 17695072-17695271         | GCCCAAAATCTTAGCCAAA       | TGGCTTGGGTTACTGGTTTCT      |
| SSR88      | 12875                 | 8014665-8014816   | 5    | 18040111-18040269         | CAAAAGGCAGGACCATAAA       | TTGCGTAGACACCACAAGGT       |
| SSR124     | 12875                 | 7542114-7542326   | 5    | 18512607-18512820         | CGCTTAAACGATCCAACGAT      | GTTTATAACCGGTGCTCGAT       |
| SSR125     | 12875                 | 7024865-7025043   | 5    | 19029891-19030069         | AGCGCTGATGCTTAAACTGC      | TTACTTGCTGACCCACTTACG      |
| SSR87      | 12875                 | 7014393-7014574   | 5    | 19040357-19040541         | CAGCGCTGCTGATTAGTTA       | TACAGCTGGCTGCGTTTATG       |
| SSR126     | 12875                 | 6381246-6381454   | 5    | 19673479-19673688         | AATTGCCAAAGAAACCACCA      | AGCGGCTCGTCTGCTGTA         |
| SSR129     | 12875                 | 6028577-6028753   | 5    | 20026180-20026357         | ACCATGAGCAGGCATCAGA       | CCGGCAATCGTCTTTAACT        |
| SSR133     | 12875                 | 5581289-5581484   | 5    | 20473430-20473645         | CTCGCAACTTGGCAGACATA      | TGCCCAATGTAAGTGTATC        |
| SSR62      | 12875                 | 4985233-4985531   | 5    | 21069407-21069701         | TGTTAGTTGGCAGCGCAAT       | GATTATGCGTGTTCGAGTCG       |
| SSR183     | 12875                 | 4001657-4001814   | 5    | 22053120-22053277         | CGTATTTGAGTCCAACGCGTTT    | CCAAACGCGTTGCACTCAAATACG   |
| SSR13      | 12875                 | 3052296-3052513   | 5    | 23002420-23002638         | CTTTATCCCGATGTGCGAGT      | GCCCAATAAACTGGAATAAG       |
| SSR11      | 12875                 | 2002257-2002505   | 5    | 24052429-24052677         | TTGGCAGAGCTTCTCACCT       | CTAAACGGGCCTCCACATT        |

<sup>1</sup> FlyBase genome release dvir1.2.

<sup>2</sup> Chromosome coordinates based on arrangement of genome scaffolds on Muller elements (Schaeffer *et al.* 2008; Ahmed-Braimah and Sweigart 2015).

<sup>3</sup> Misplaced scaffold portion in original genome assembly (Schaeffer *et al.* 2008).
