# Supplementary material for: Multiple Genes Cause Postmating Prezygotic Reproductive Isolation in the Drosophila virilis Group
Source: PubMed Central journal article supplement (PMC5144975; doi:10.1534/g3.116.033340), 2016-10-10
Supplement: supp_g3.116.033340_TableS2.pdf [file supp_g3.116.033340_TableS2.pdf]

■ **Table S2** Full MQM model result

|              | <b>df</b> | <b>SS</b> | <b>MS</b> | <b>LOD</b> | <b>%var</b> | <b><i>p-value</i>(<math>\chi^2</math>)</b> | <b><i>p-value</i>(F)</b> |
|--------------|-----------|-----------|-----------|------------|-------------|--------------------------------------------|--------------------------|
| <b>Model</b> | 6         | 397771.9  | 66295.31  | 111.51     | 24.33       | 0                                          | 0                        |
| <b>Error</b> | 1835      | 1237202.8 | 674.23    |            |             |                                            |                          |
| <b>Total</b> | 1841      | 1634974.7 |           |            |             |                                            |                          |
