# Supplementary material for: Multiple Genes Cause Postmating Prezygotic Reproductive Isolation in the Drosophila virilis Group
Source: PubMed Central journal article supplement (PMC5144975; doi:10.1534/g3.116.033340), 2016-10-10
Supplement: supp_g3.116.033340_TableS4.pdf [file supp_g3.116.033340_TableS4.pdf]

■ **Table S4** Estimated phenotypic effects and physical location of putative QTL

|                         | Estimated effect | S.E. |
|-------------------------|------------------|------|
| <b>Intercept</b>        | 26.7             | 1.5  |
| <b>2@84.0 (va)</b>      | 15.2             | 1.8  |
| <b>5@60.3 (SSR169)</b>  | -10.5            | 2.7  |
| <b>5@116.0 (SSR60)</b>  | 9.2              | 2.2  |
| <b>5@127.1 (SSR116)</b> | 6.9              | 2.5  |
| <b>5@142.0 (SSR11)</b>  | 13.7             | 2.2  |
| <b>2@84.0:5@142.0</b>   | 13.6             | 3.6  |
